# Supplementary material for: Characterization of partially ordered states in the intrinsically disordered N-terminal domain of p53 using millisecond molecular dynamics simulations
Source: Springer Nature journal article supplement (doi:10.1038/s41598-020-69322-2), 2020-07-24
Supplement: 41598_2020_69322_MOESM1_ESM.pdf [file 41598_2020_69322_MOESM1_ESM.pdf]

Supplementary Information: Characterization of partially ordered states in the p53 intrinsically disordered N-terminal domain using millisecond molecular dynamics simulations

Pablo Herrera-Nieto<sup>a</sup>, Adrià Pérez<sup>a</sup>, and Gianni De Fabritiis<sup>a,b</sup>

<sup>a</sup>Computational Science Laboratory, Barcelona biomedical research park (PRBB),  
Universitat Pompeu Fabra, C Dr Aiguader 88, Barcelona 08003, Spain

<sup>b</sup>Institució Catalana de Recerca i Estudis Avançats (ICREA), Passeig Lluís  
Companys 23, 08010 Barcelona, Spain

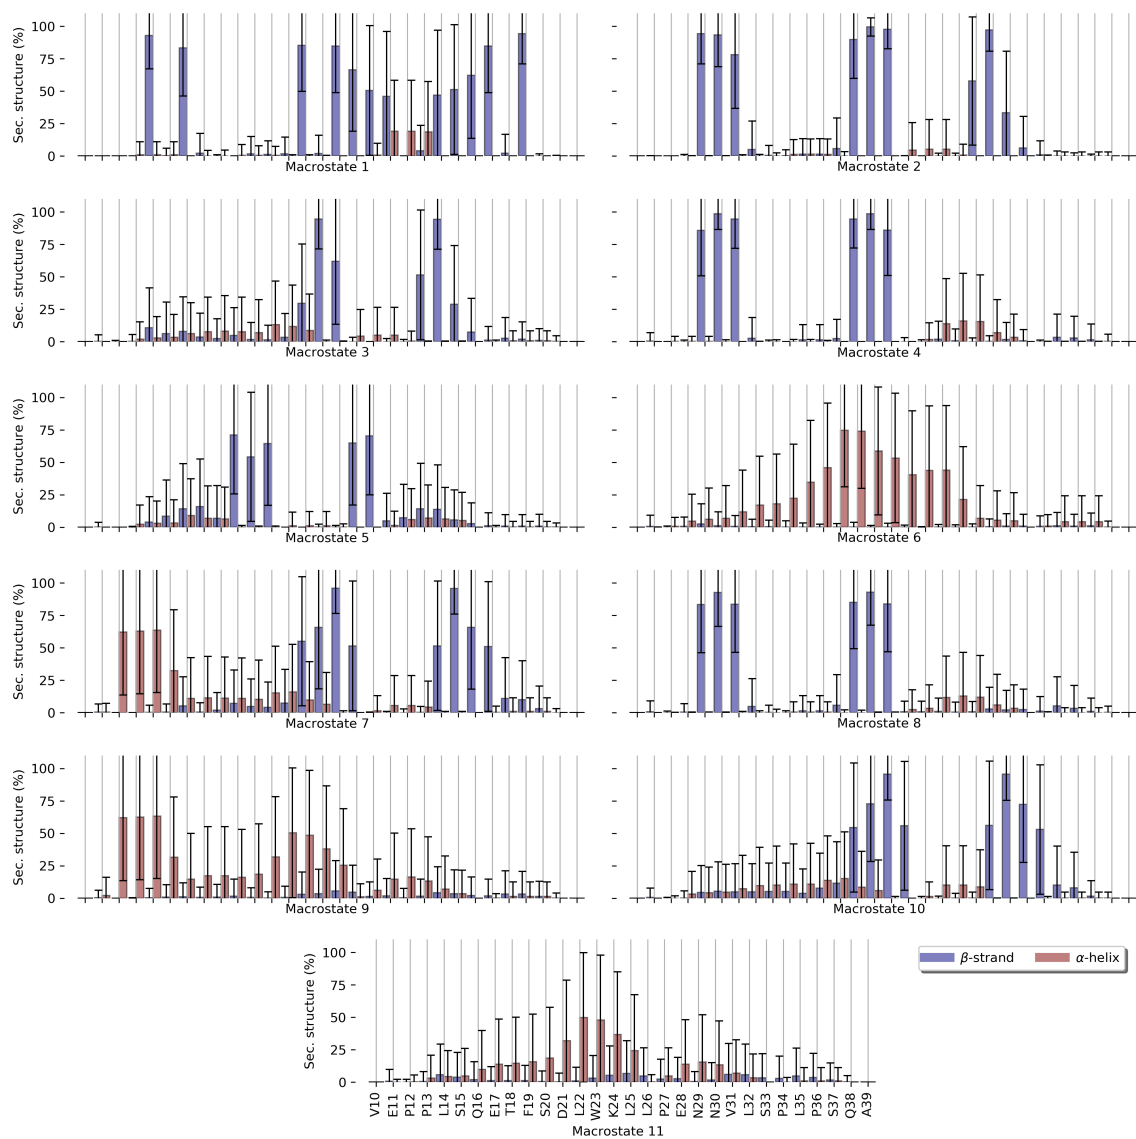

Figure 1: Secondary structure profile for all MSM macrostates.

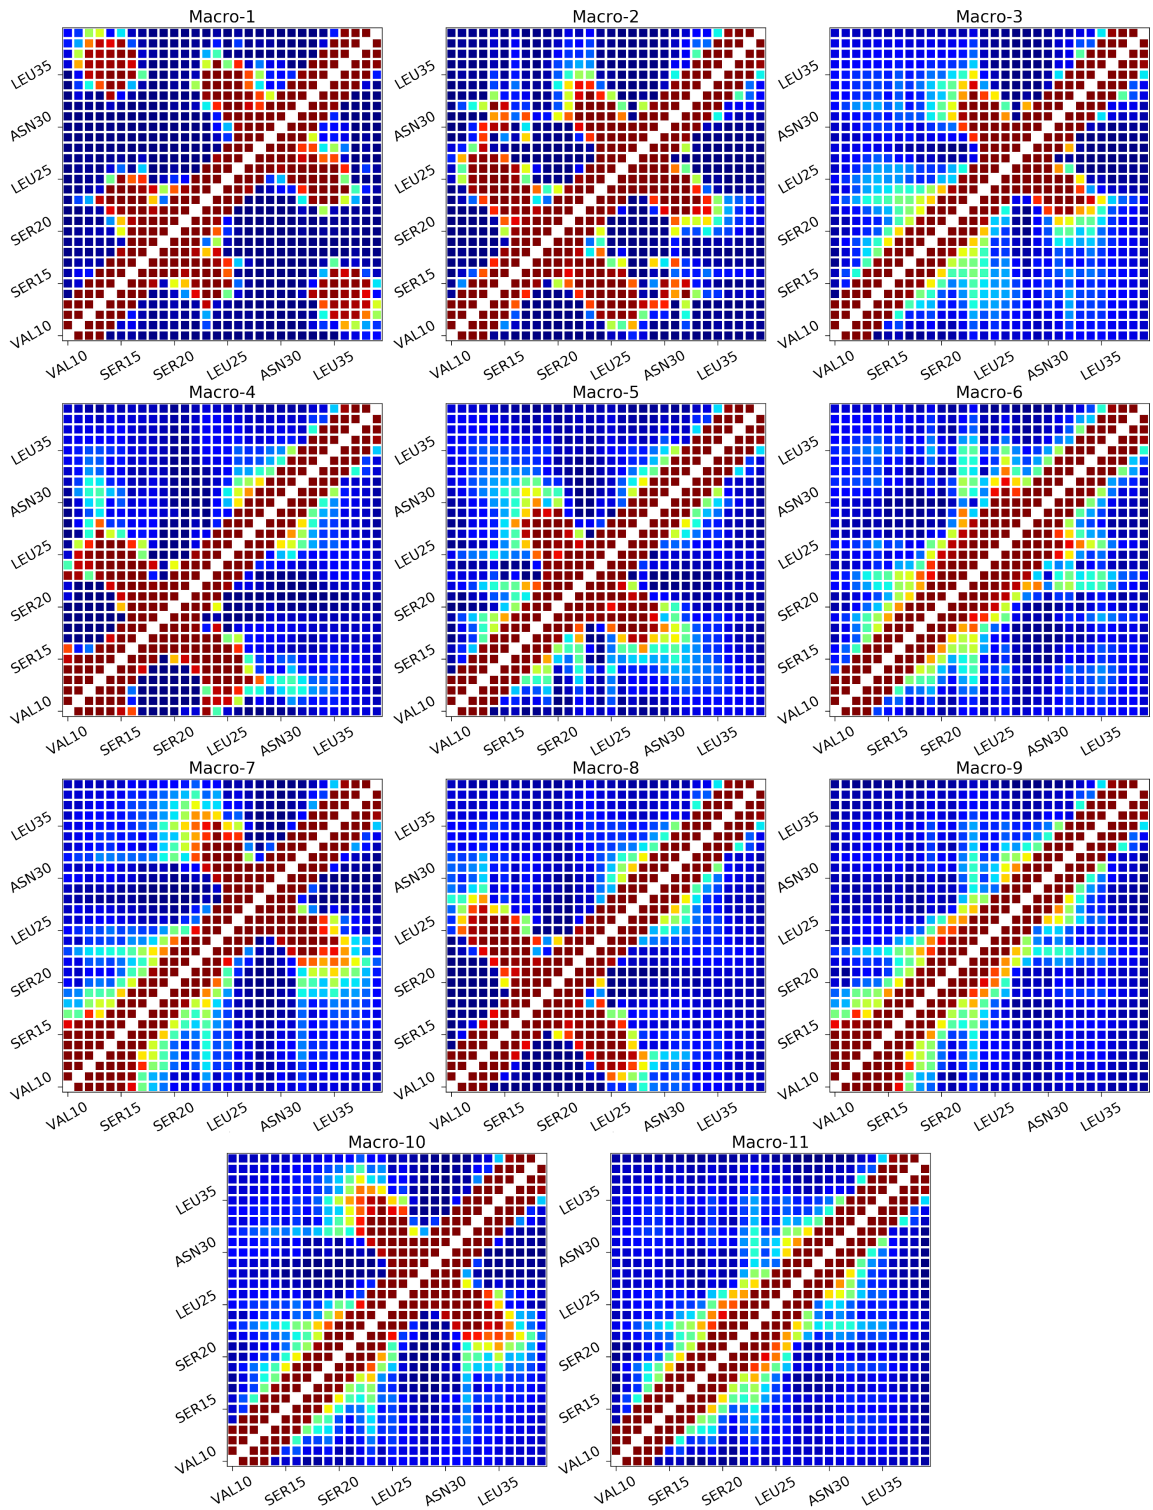

Figure 2: **Residue-residue contacts** for all MSM macrostates.

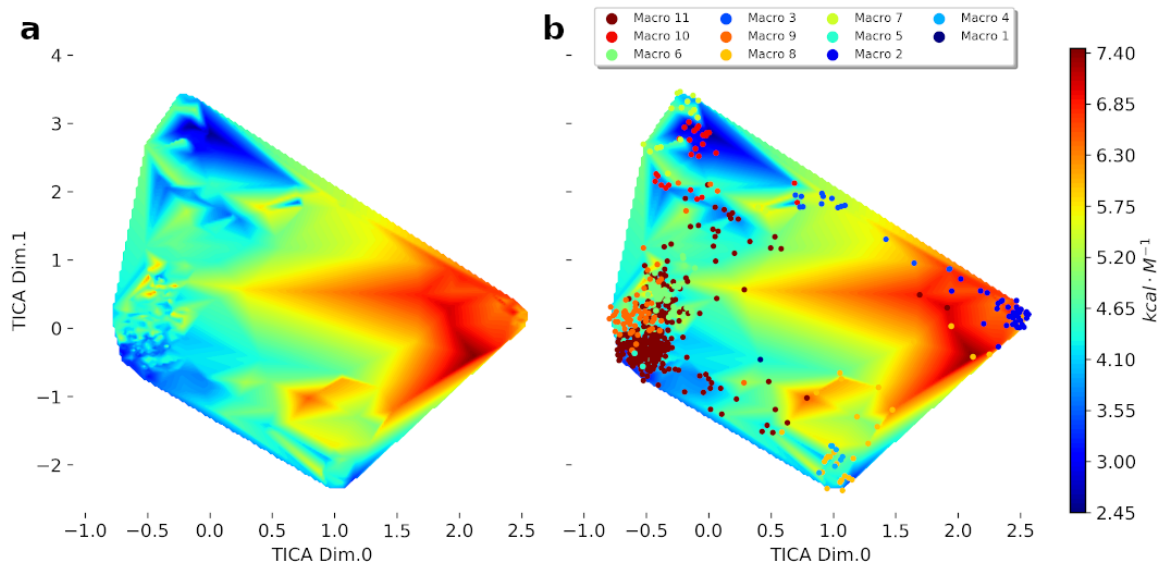

Figure 3: **Free Energy surface** of p53 in a) p53, and microstates centers in b). Microstates are color mapped according to their macrostates.

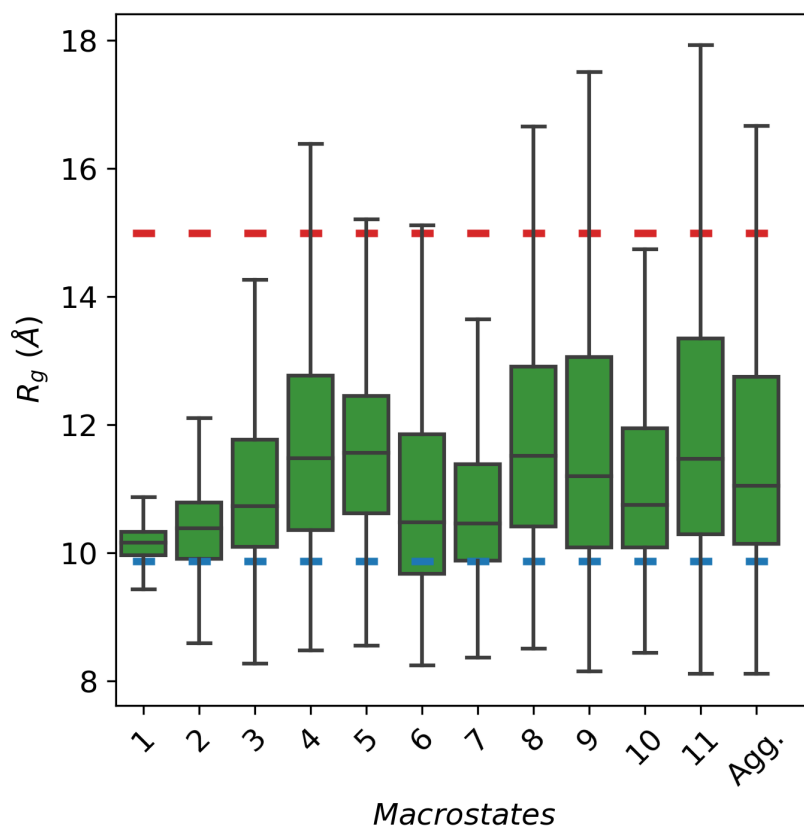

Figure 4: **Radius of gyration** ( $R_g$ ) by macrostate.  $R_g$  was computed as  $R_g = \sqrt{\sum_{i=1}^n m_i * s_i^2 / \sum_{i=1}^n m_i}$  for a molecule of  $n$  atoms, where  $s_i$  is the distance to the center of mass of each atom. Theoretical upper (in red) and lower (in blue) bounds were solely calculated based on the peptide length ( $N$ ) using  $R_g = 2.54 * N^{0.522}$  for the upper and  $R_g = (3/5)^{1/2} * 4.75 * N^{0.29}$  for the lower bound [1].

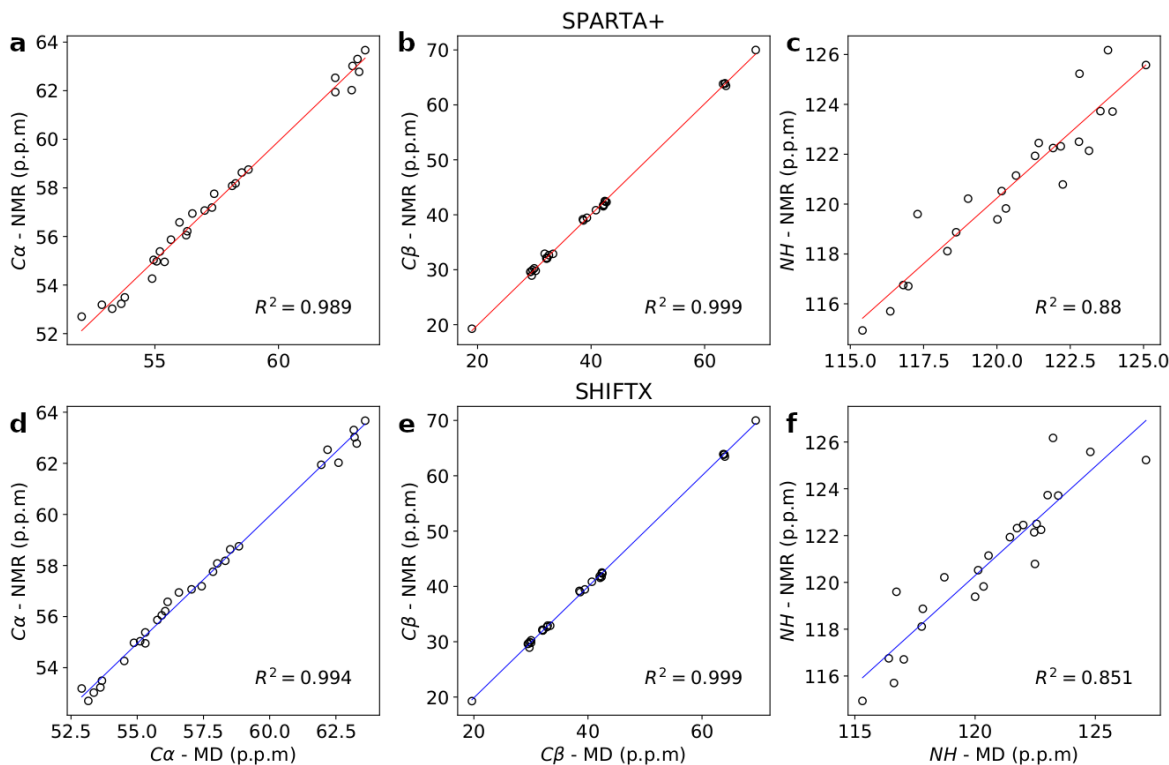

Figure 5: **Comparison against NMR data.** Chemical shift difference between MD-derived calculations for a), d)  $C\alpha$ , b), e)  $C\beta$ , and c), f)  $NH$  atoms and the experimentally measured for the N-terminal of p53 (Biological Magnetic Resonance Data Bank entry number 17760). Experimental data was obtained for the full length N-terminal domain (residues 1-96) but only data corresponding to residues 10 to 40 was used for the comparison. Calculations were performed with SPARTA+ (top row) and SHIFTX2 (bottom row).

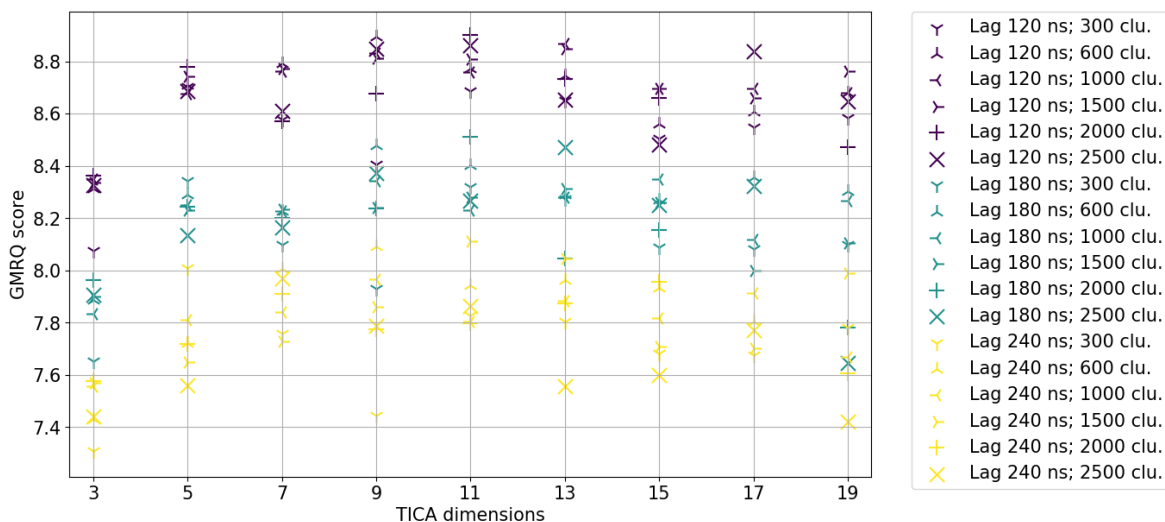

Figure 6: **Model selection.** The generalized matrix Rayleigh quotient (GMRQ) yields a score that allows to compare different MSMs built with the same data, hence it offers a way to perform parameter selection [2]. We computed  $\sim 160$  MSM with different number of TICA components (projected at a fixed lag time of 2 ns) and clusters. For each model we report the mean GMRQ value for 10 rounds of cross validation. The procedure shows similar trends across all lag times: the GMRQ peaks using 9, 11 or 13 TICA dimension. A final model with 9 TICA dimensions and 600 clusters was selected.

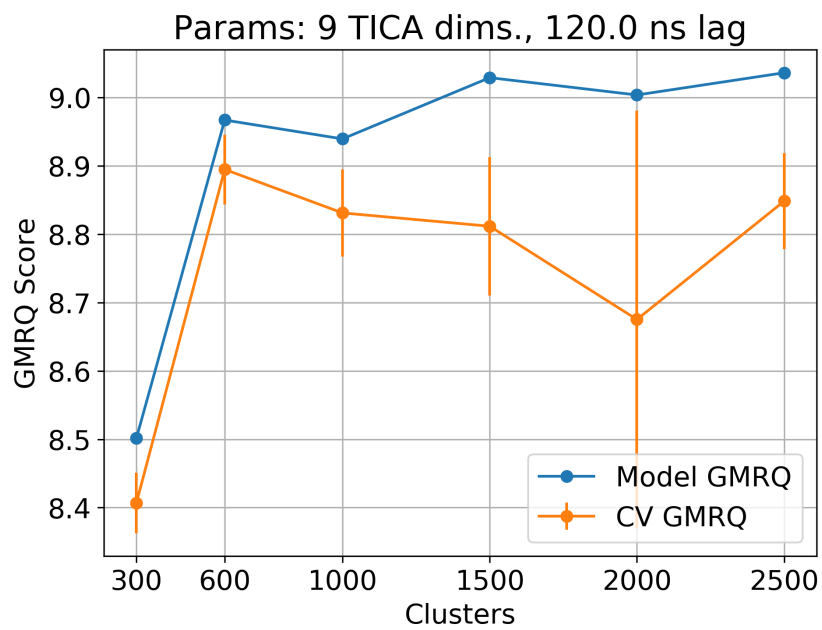

Figure 7: **Model parameters: cluster selection.** The effect of the number of clusters shows a maximum score with 600 clusters.

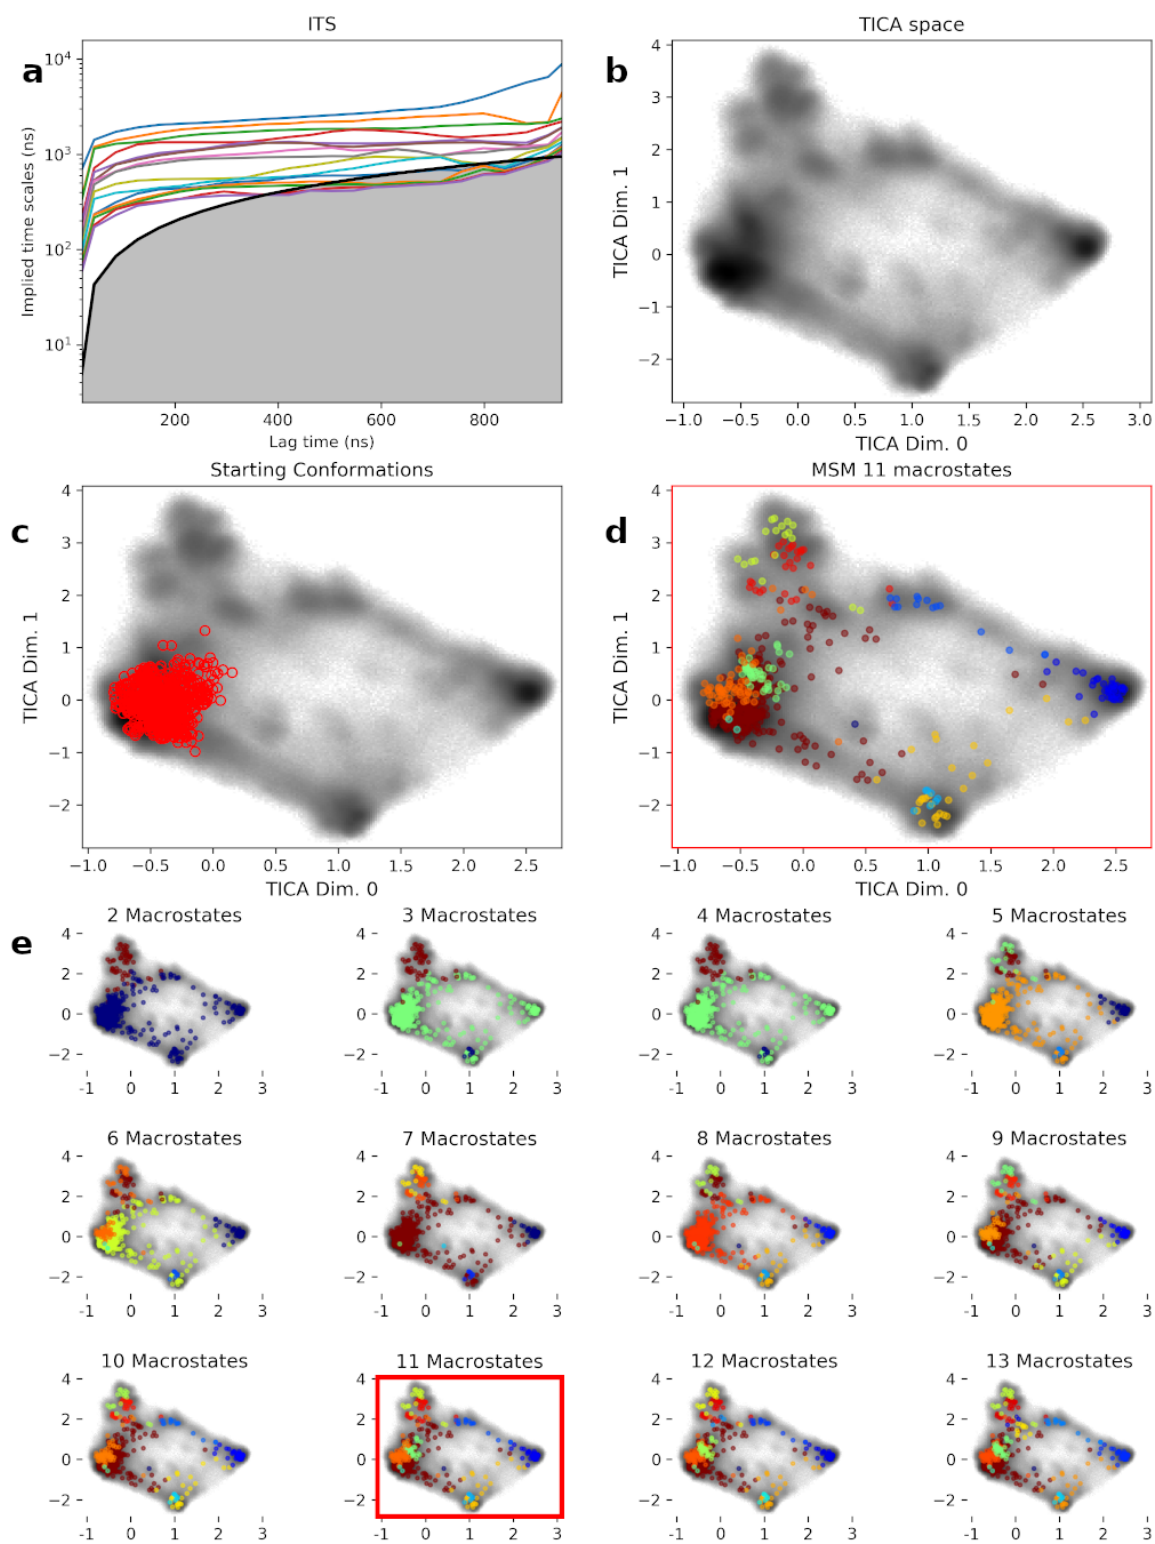

Figure 8: **Markov State Model** parametrization. **a) Implied times scales.** A final lag time of 120 ns was used to create the MSM. **b) TICA space** for the first and the second TICA dimensions. **c) Starting conformations** location on the TICA space. **d) Macrostate distribution** on the TICA space. Microstates are located based on their centers and color mapped following their macrostates assignment. **e) Discretization of the TICA space** by incrementing the number of macrostates. A final number of 11 macrostates was chosen.

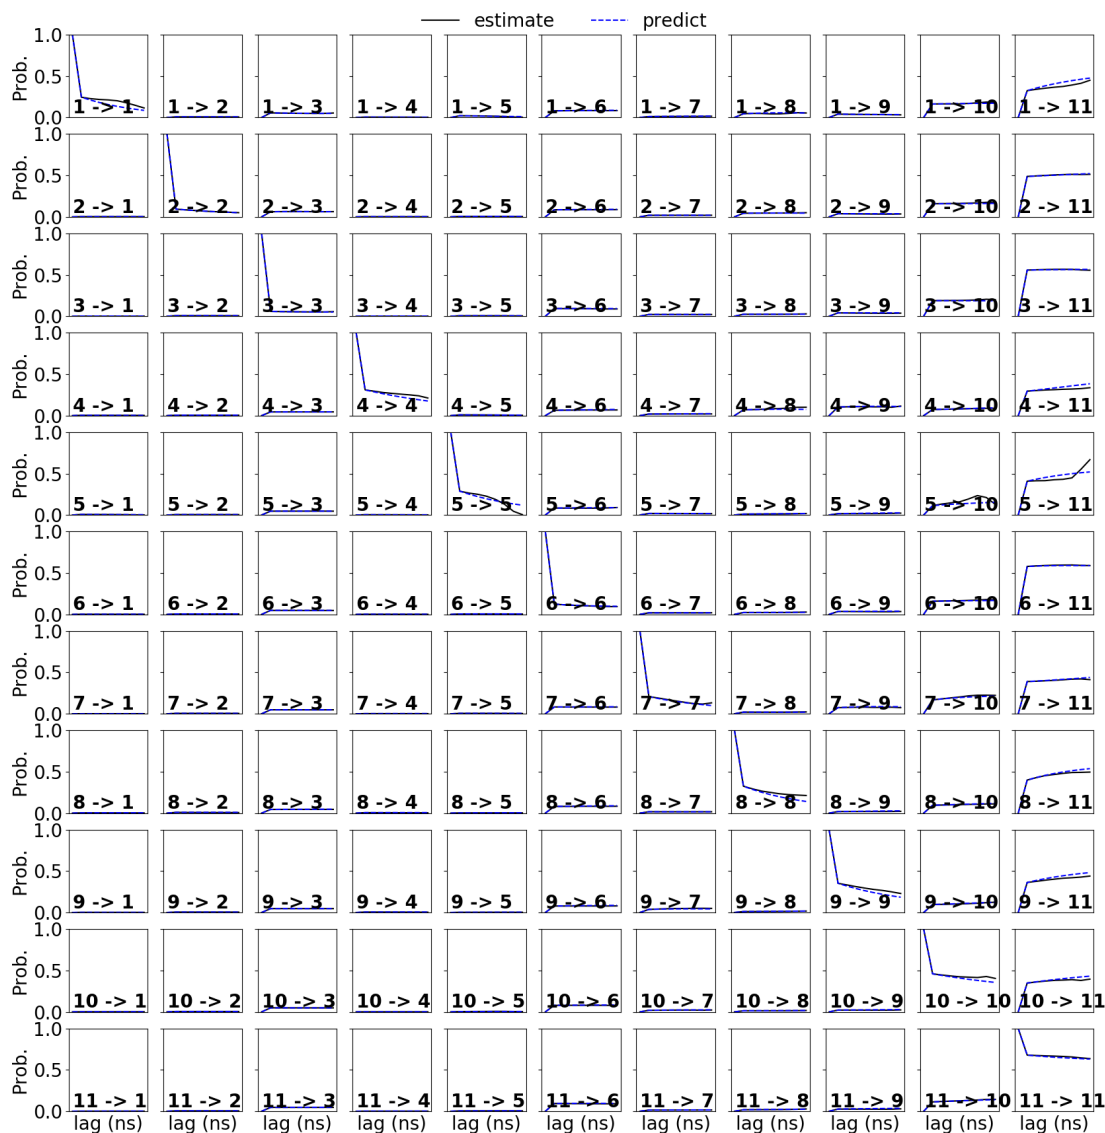

Figure 9: **Chapman-Kolmogorov test.** Chapman-Kolmogorov test shown for all transitions on the 600-microstate MSM. The Chapman-Kolmogorov test is performed to know whether the model make predictions (dashed lines) which are consistent with the data (solid lines).



## References

- [1] Deborah K Wilkins, Shaun B Grimshaw, Véronique Receveur, Christopher M Dobson, Jonathan A Jones, and Lorna J Smith. Hydrodynamic radii of native and denatured proteins measured by pulse field gradient nmr techniques. *Biochemistry*, 38(50):16424–16431, 1999.
- [2] Robert T McGibbon and Vijay S Pande. Variational cross-validation of slow dynamical modes in molecular kinetics. *The Journal of chemical physics*, 142(12):03B621\_1, 2015.
